# Supplementary material
Source: PubMed Central journal article supplement (PMC3406155)
Supplement: AEM.00714-12_zam999103503so1.pdf [file AEM.00714-12_zam999103503so1.pdf]

## SUPPLEMENTARY MATERIAL

**Figure SF1.** Maximum likelihood-based tree showing the phylogenetic relationship of the bacterial strains from different phylogenetic groups ( $\alpha$ -*proteobacteria* = **1A**;  $\beta$ -*proteobacteria* = **1B**;  $\gamma$ -*proteobacteria* = **1C**; *Firmicutes* = **1D**; *Actinobacteria* = **1E**; *Bacteroidetes* = **1F**) based on the partial sequences of the 16S rRNA gene. N<sub>2</sub>-fixing microorganisms obtained in the current study along with those of the closely related sequences obtained from the Genbank are presented in different colors (black = direct plating; red = enrichment in semisolid N-free medium before plating; blue = enrichment followed by subculturing in semisolid N-free medium before plating; and bold black = GenBank sequences). Numbers above the nodes represent maximum likelihood bootstrap support above 70% and numbers in parentheses represent bootstrap values from neighbor joining, maximum parsimony, and Bayesian analyses, respectively. An asterisks (\*) at the node reflects a bootstrap support above 70% for at least three of the four phylogenetic methods. Same super script with some of the *Pseudomonas* strains represents the isolates detected to high frequency, showed identical DNA profiles as well as identical 16S rRNA gene sequences. Genus level clustering is represented on the right.

**Figure SF2.** Representative genomic fingerprint profiles of different free-living diazotrophs isolated from the Amazon forest soil. Name in parentheses represents the closest cultured relative microorganism identified based on partial sequencing of the 16S rRNA gene. Four right most lanes represent pure culture isolates obtained from ATTC. Fragment sizes on the left represent those of a DNA size marker.

**Table ST1.** Blast search results of partial sequences of the 16S rRNA gene from the Amazon forest isolates. Only closest cultured relatives are presented. Third column represents the frequency of an isolate was observed in this study with all three isolation strategies. The double positive sign (++) in the ARA column represents a higher acetylene reduction activity for the isolate in comparison to that for the positive control *Herbaspirillum seropedicae* (28 nmol/ml C<sub>2</sub>H<sub>4</sub> produced per week). Same super script with some of the *Pseudomonas* strains represents the isolates detected to high frequency, showed identical DNA profiles as well as identical 16S rRNA gene sequences. This was done to confirm the DNA finger printing results by sequencing few strains.

Fig. 1A

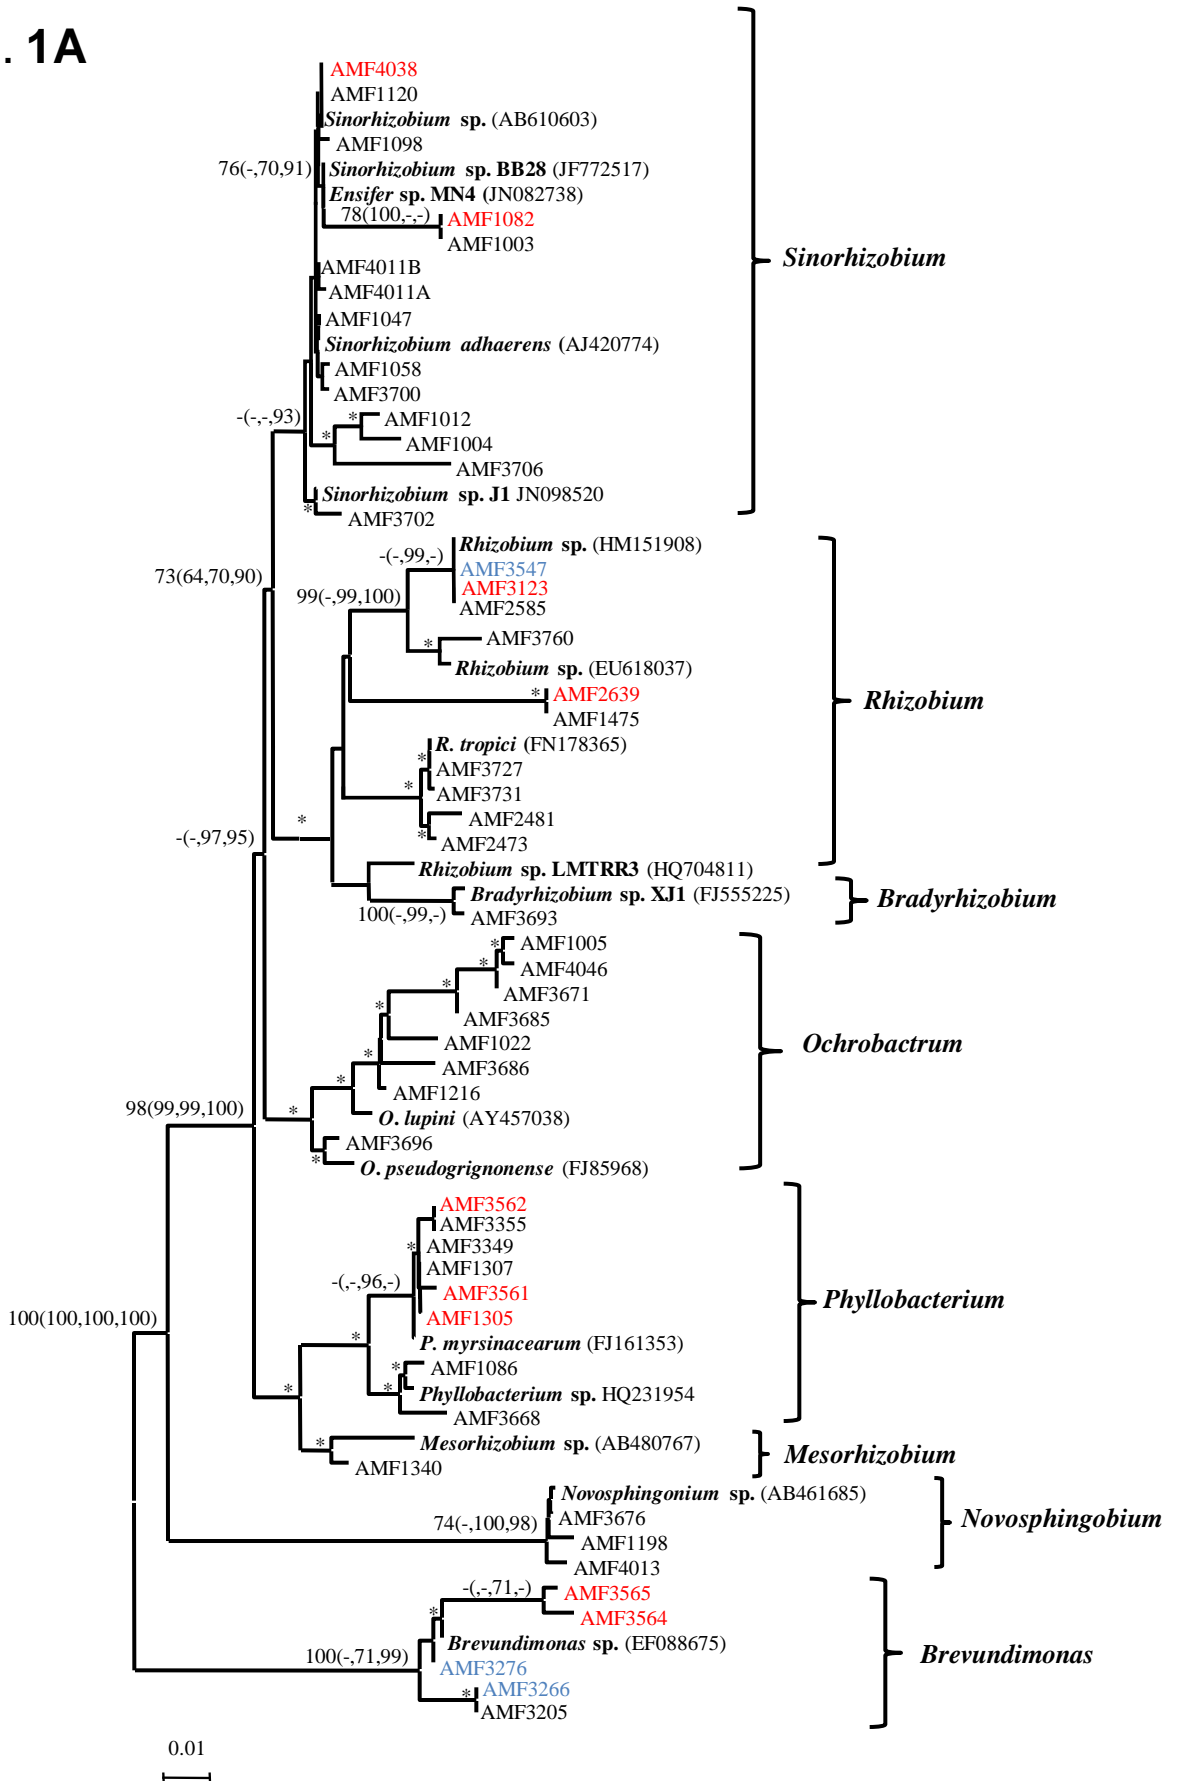

Fig. 1B

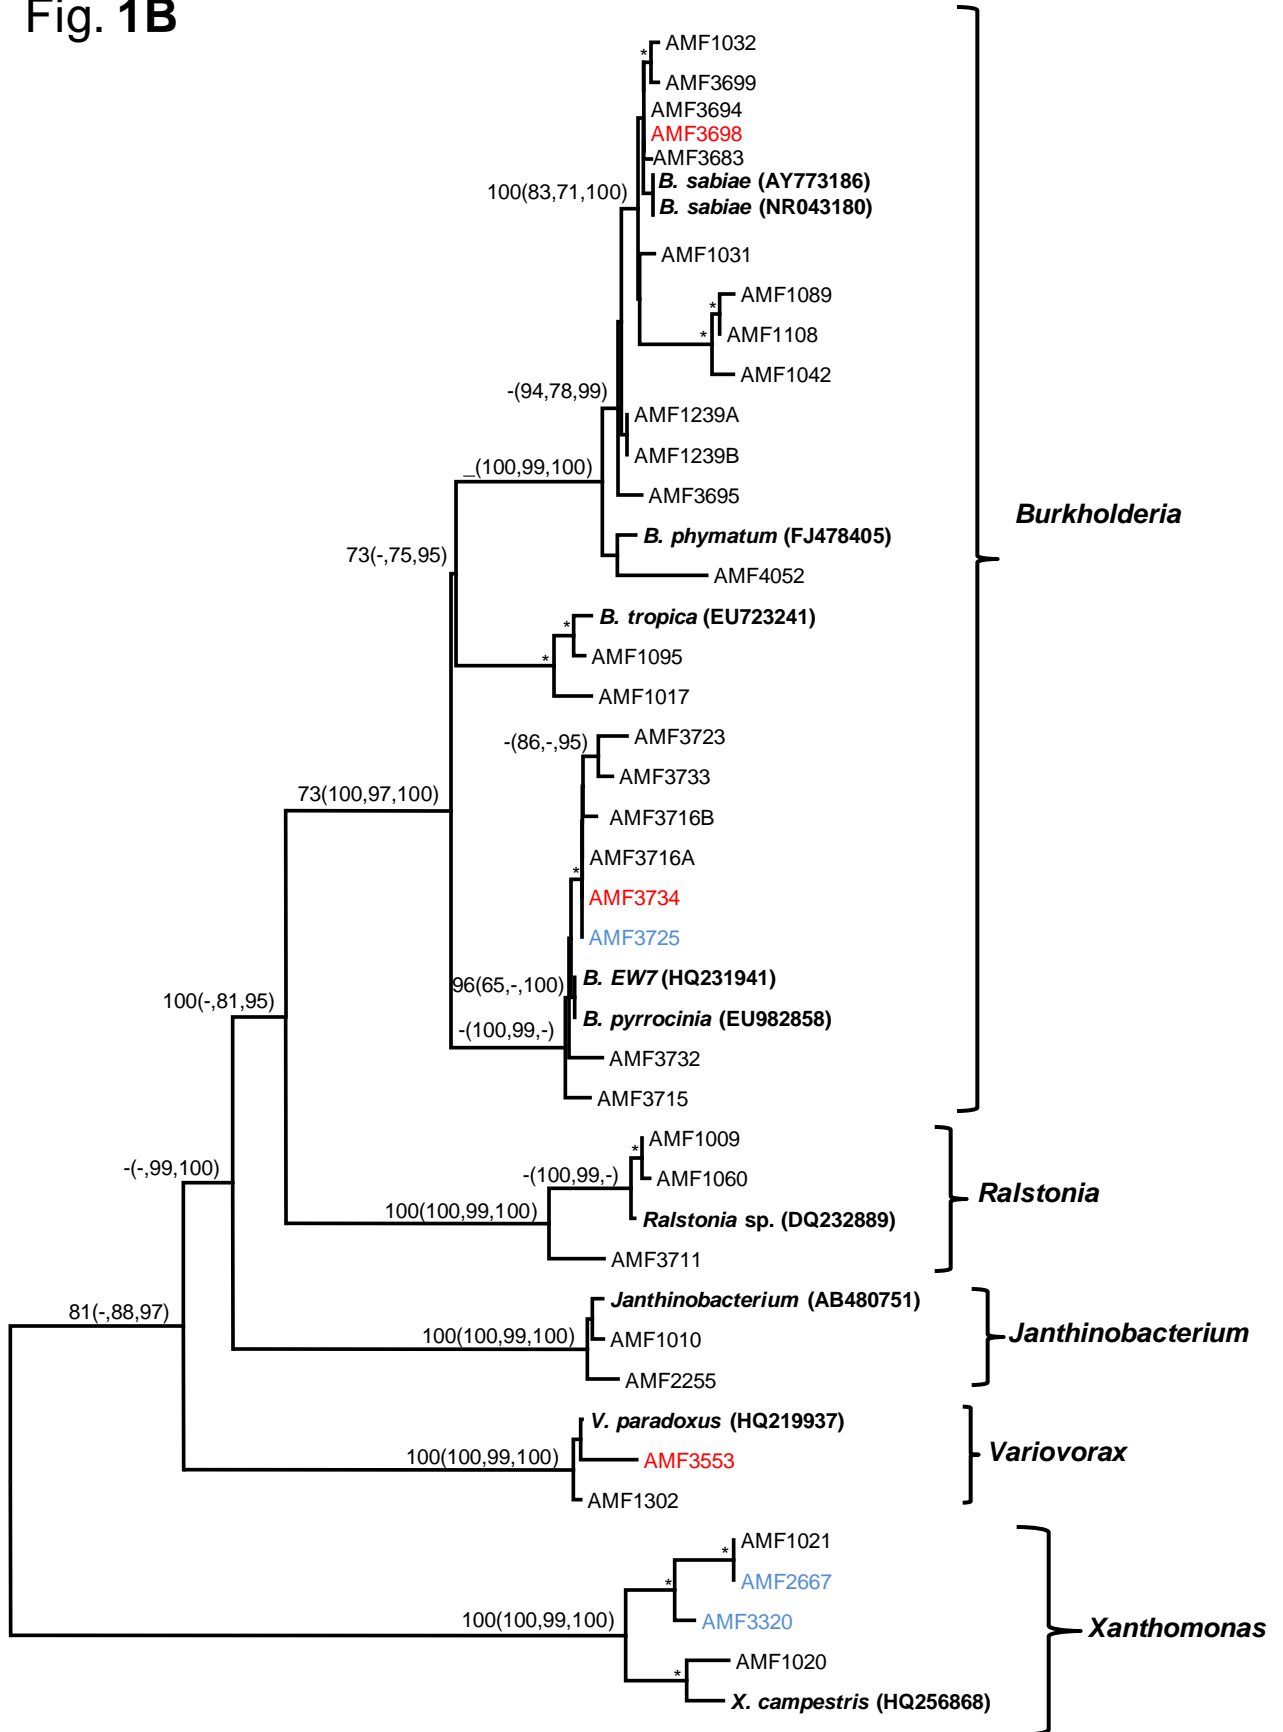

Fig. 1C

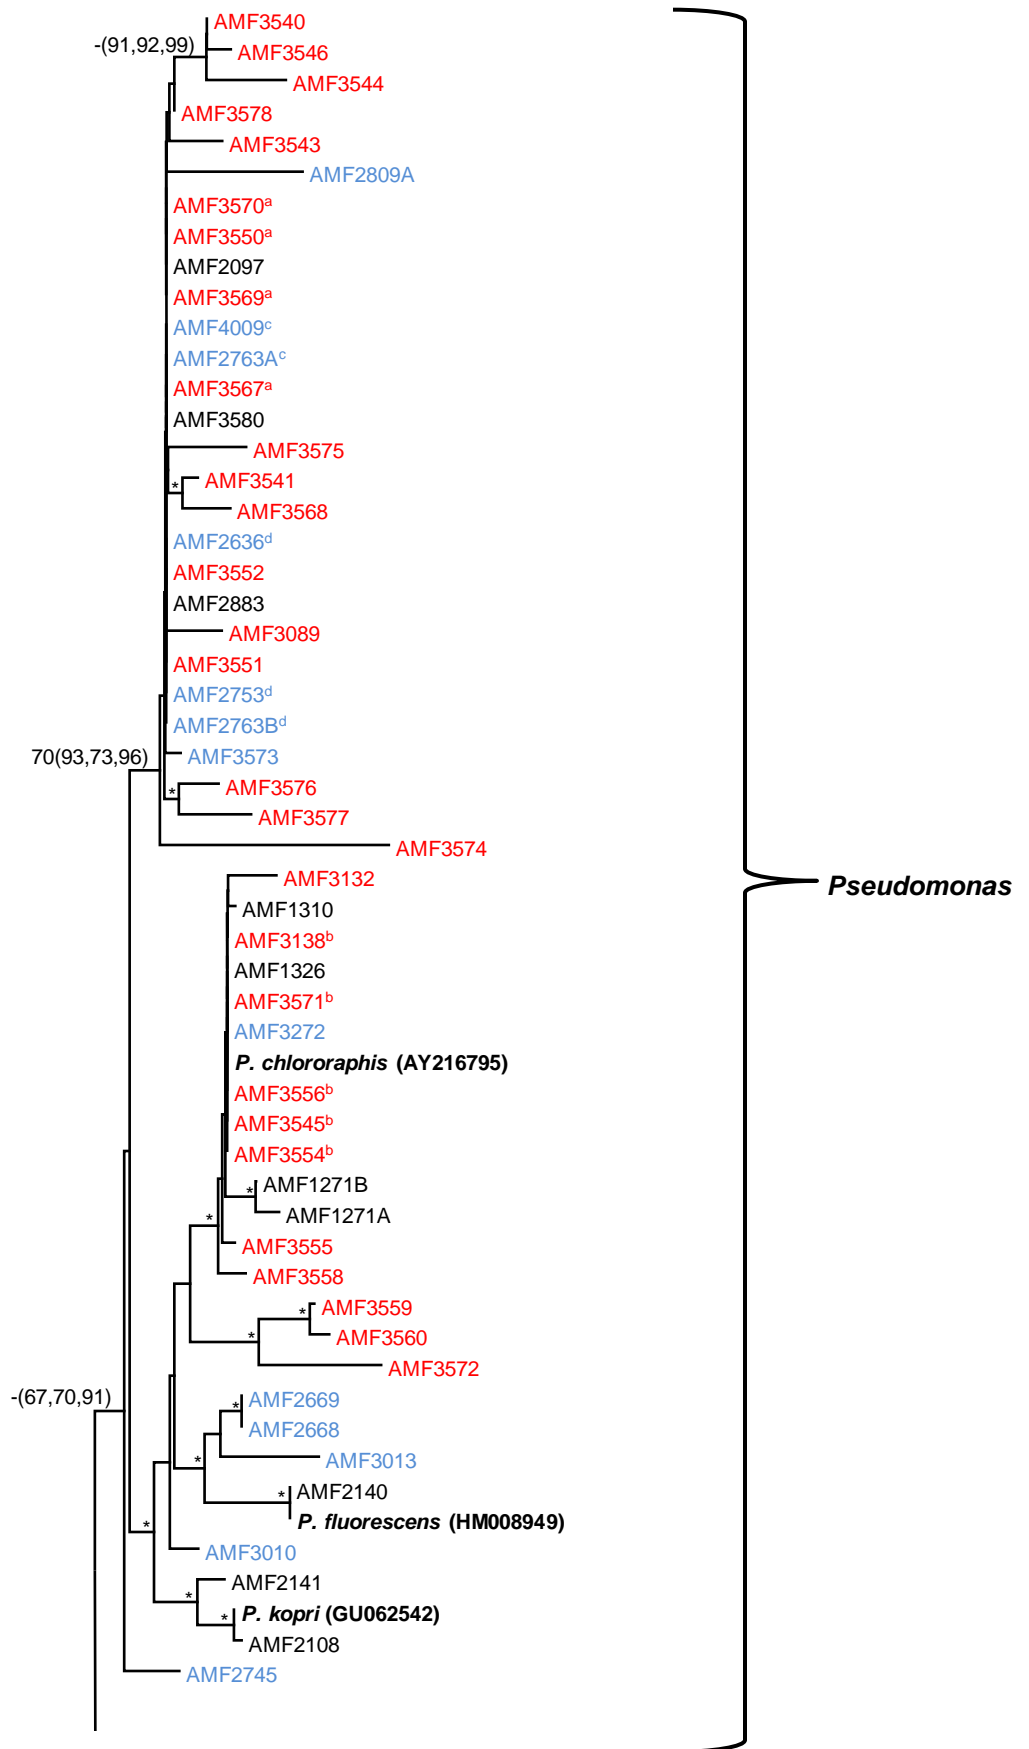

To be continued to the next page

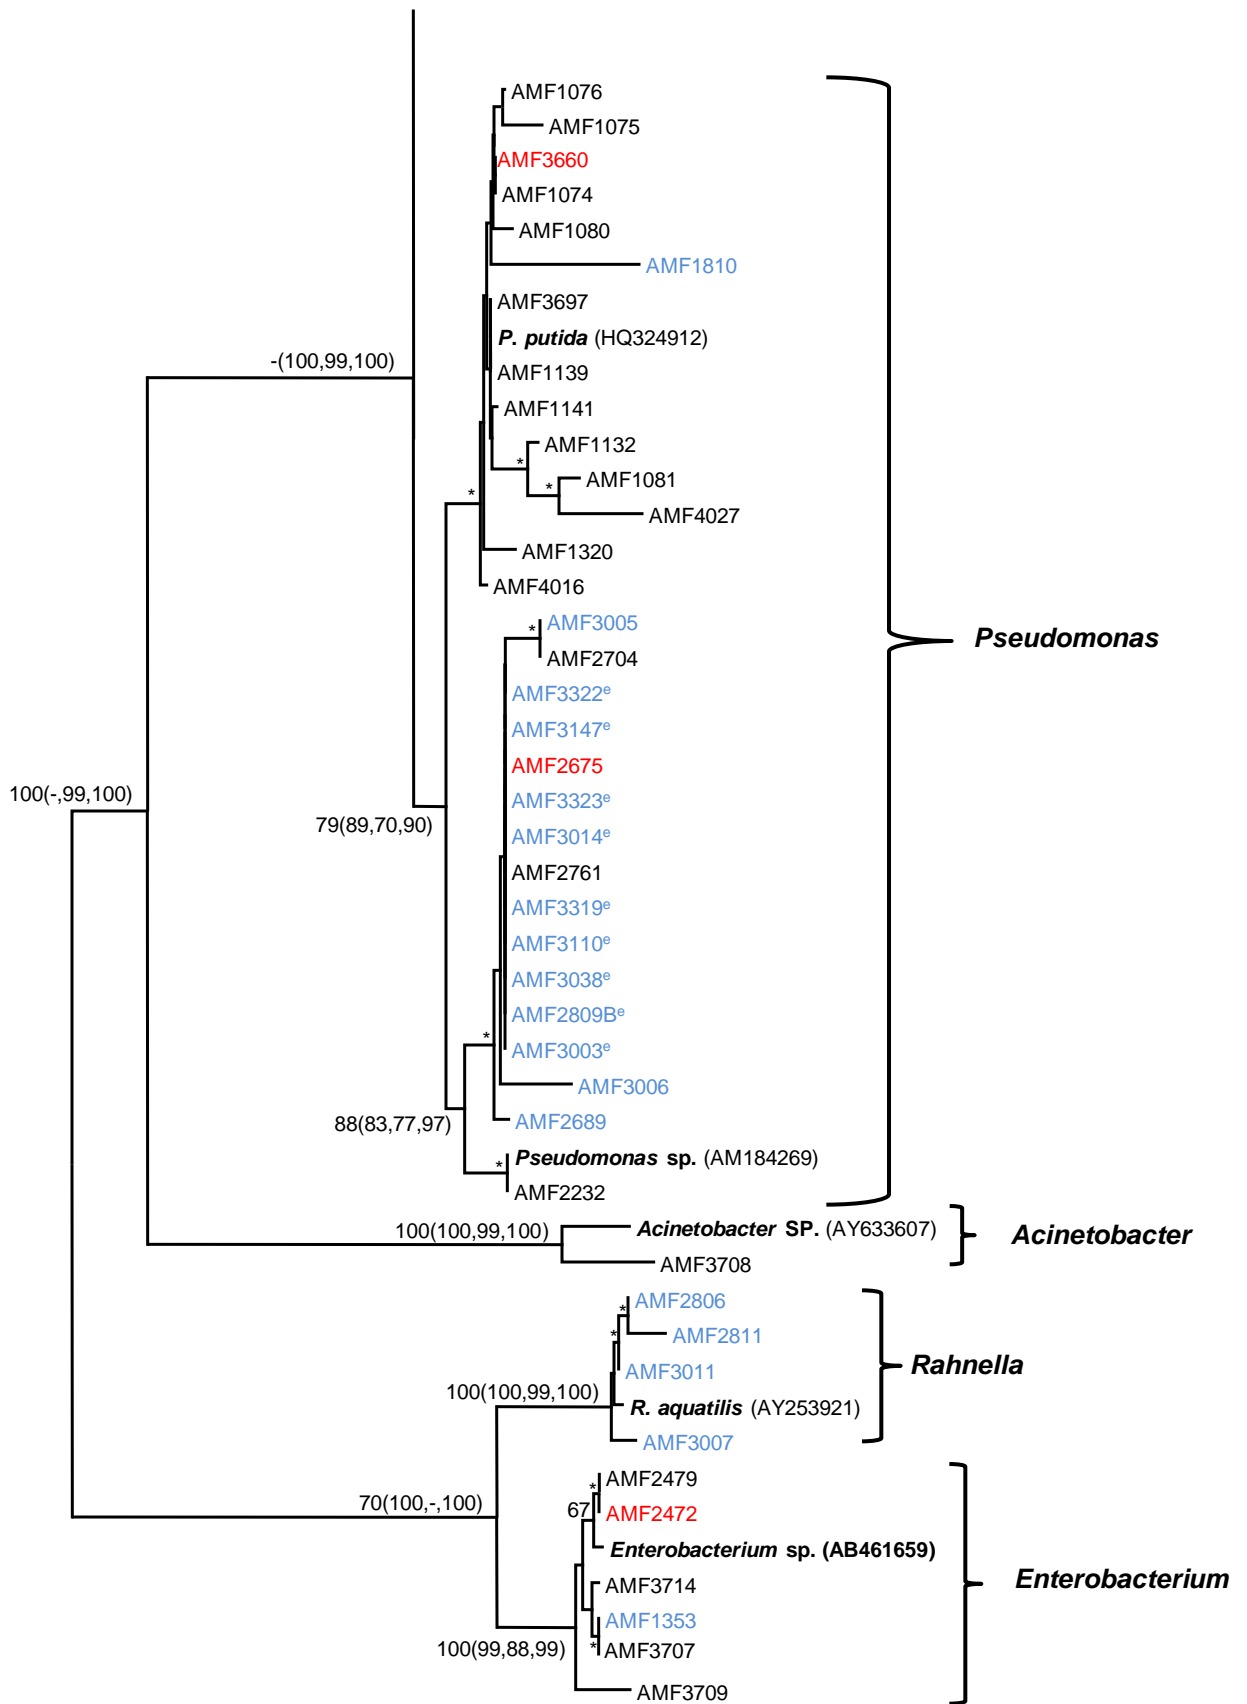

Fig. 1D

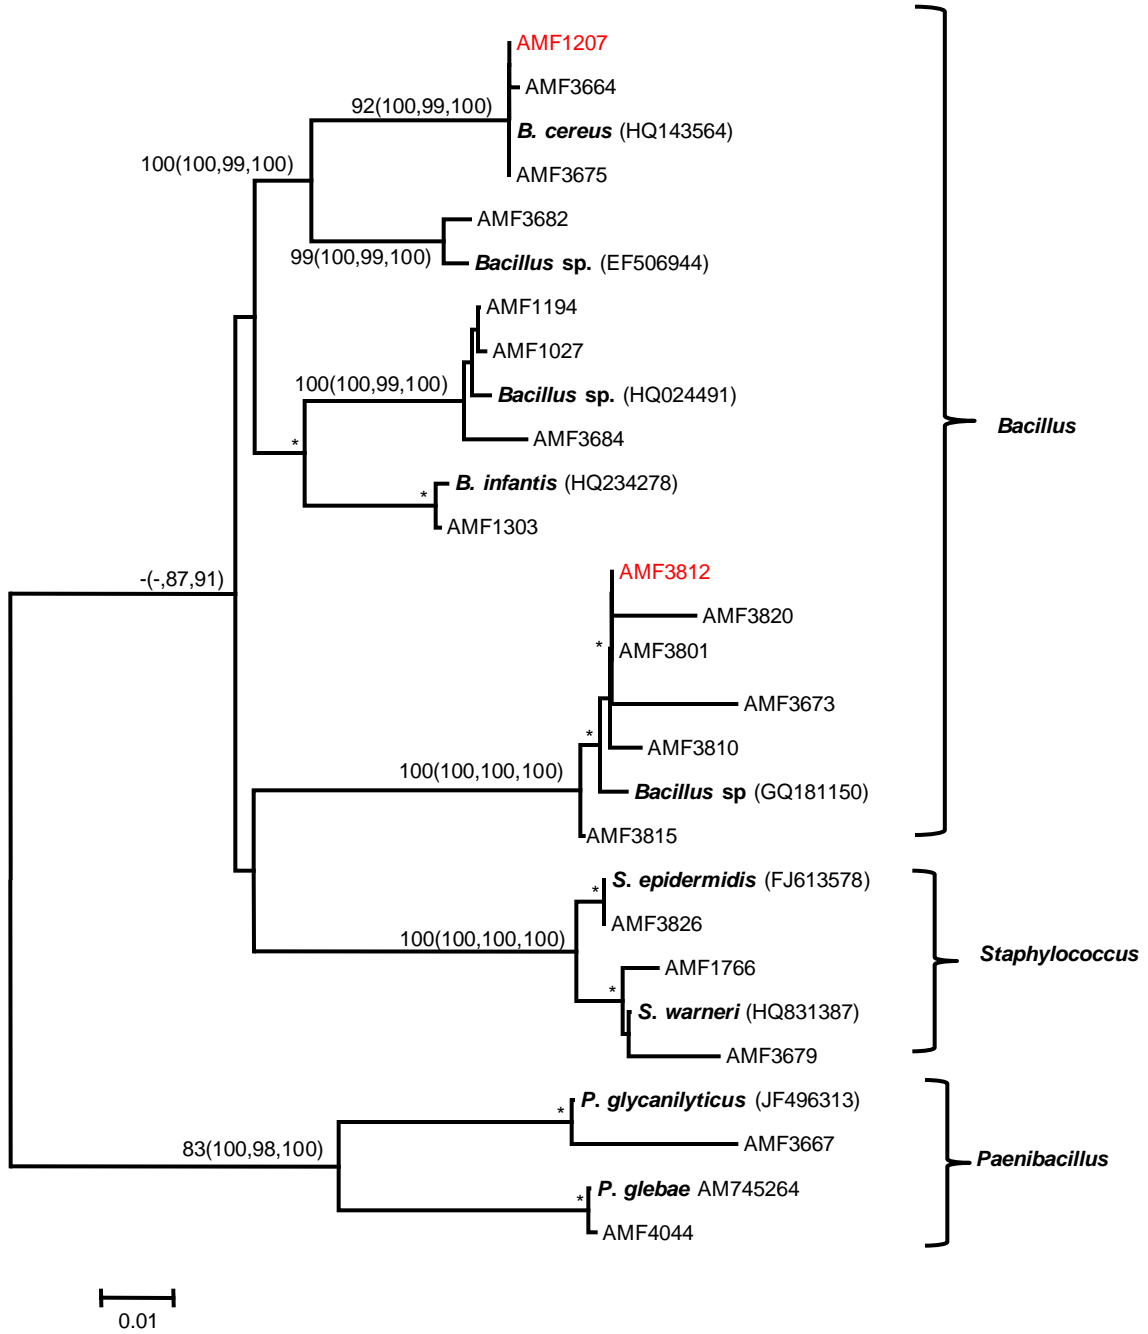

Fig. 1E

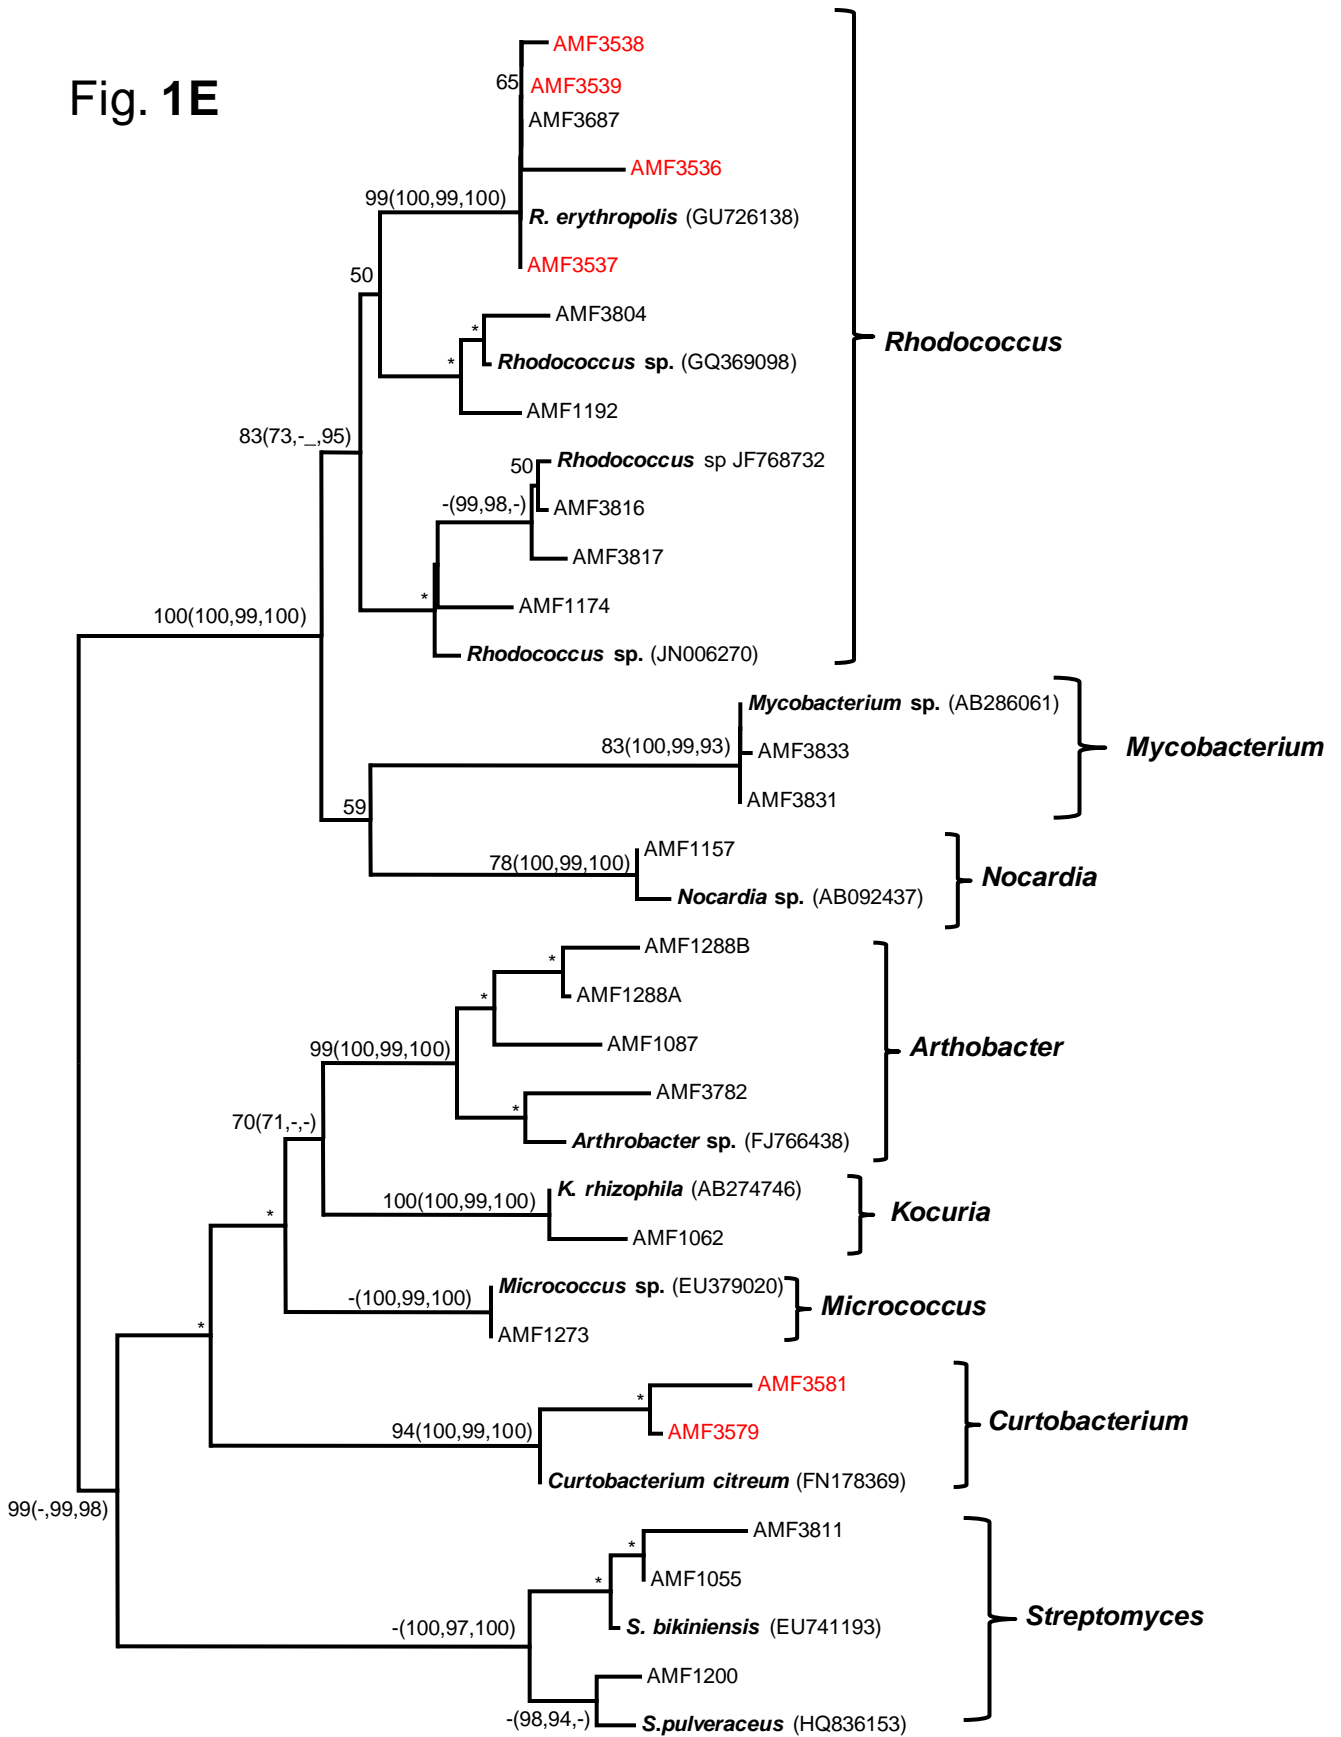

0.01

Fig. 1F

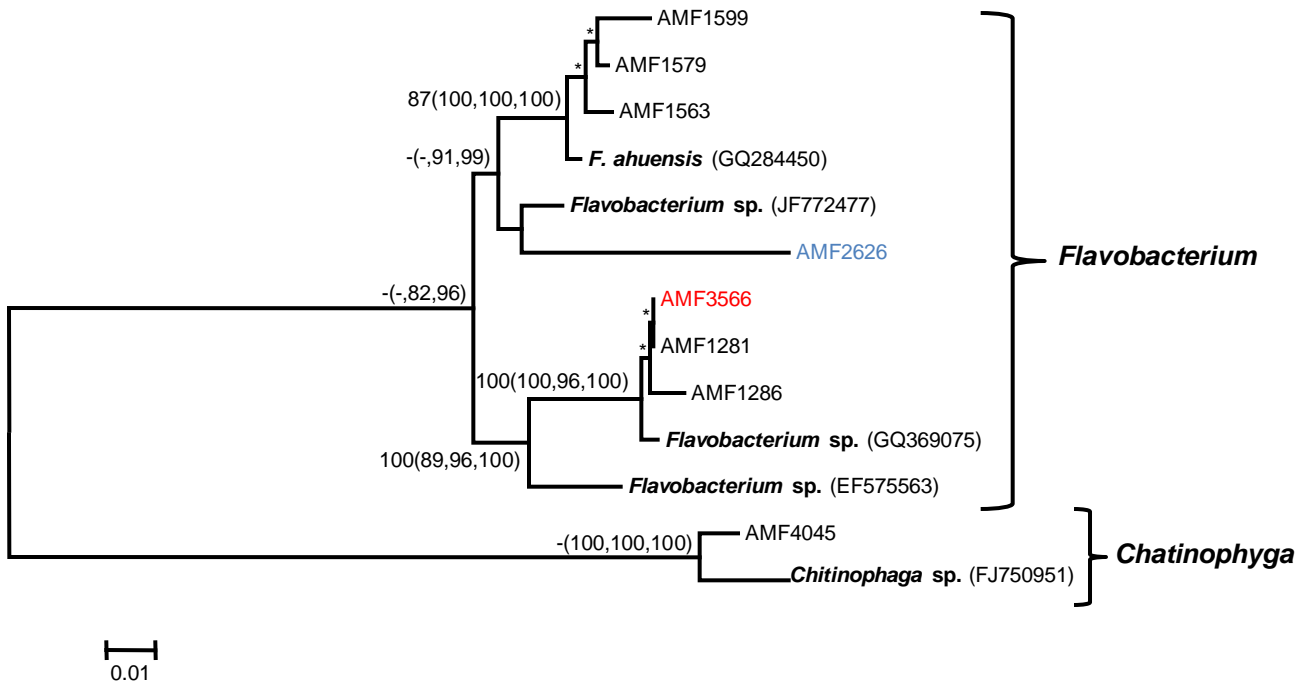



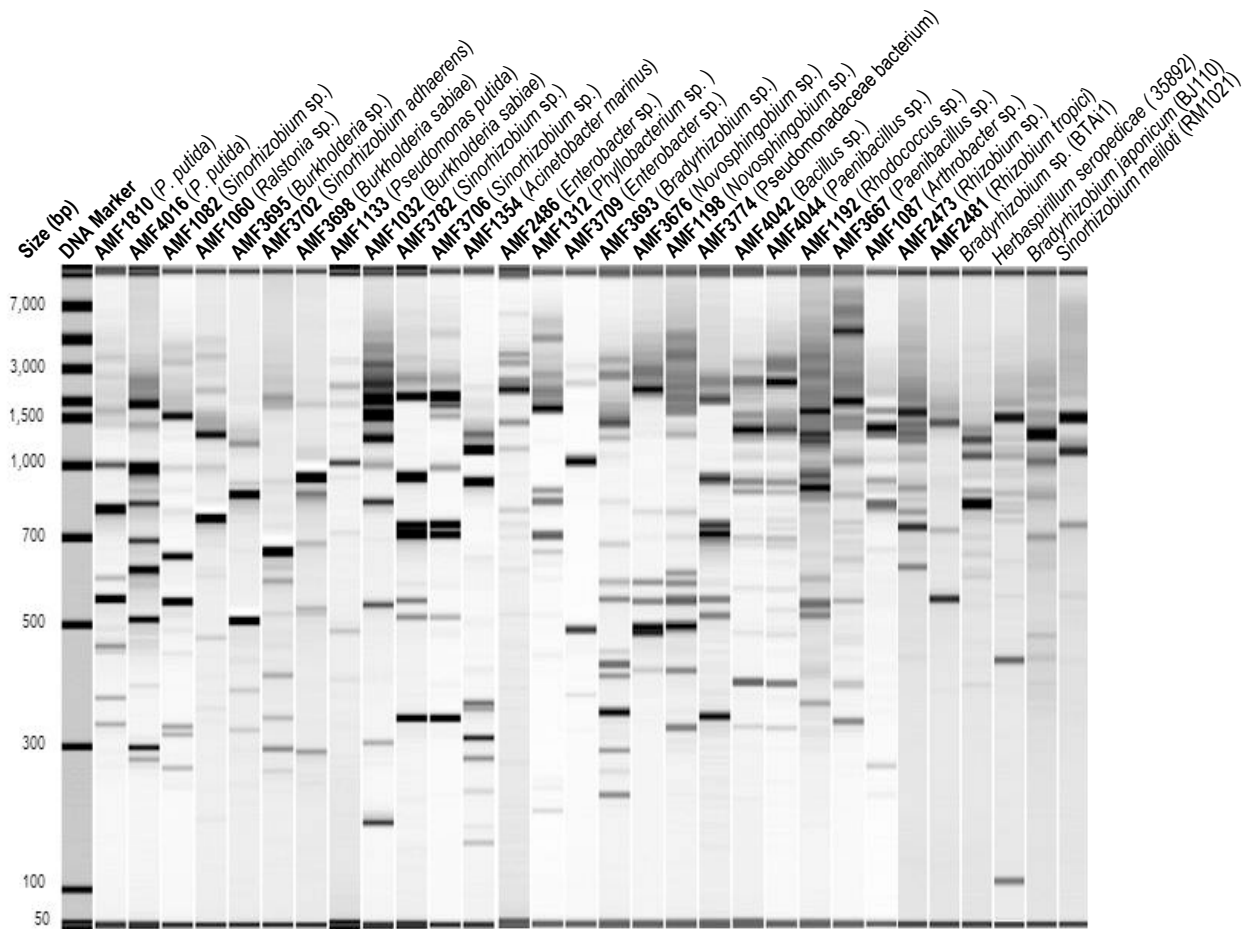

**SI Table 1: Analysis of the organisms isolated from the Amazon forest under different oxygen concentrations. Identification was performed on the basis of partial 16S rRNA gene sequences and closest cultured relatives as identified by using the BLAST search in the GeneBank databases are presented in table.**

**Isolates from solid hypoxic plates (incubated under 2% oxygen concentration)**

| Strain                | Accession number | In-group Isolates | ARA | <i>nifH</i> | Closest cultured organism               | Nucleotide identity (%) |
|-----------------------|------------------|-------------------|-----|-------------|-----------------------------------------|-------------------------|
| <i>Sinorhizobium</i>  |                  |                   |     |             |                                         |                         |
| AMF4011A*             | JQ316268         | 1                 | (-) | (+)         | <i>Sinorhizobium</i> sp. (HM151907)     | 99                      |
| AMF4011B*             | JQ316265         | 1                 | (-) | (+)         | <i>Sinorhizobium</i> sp. (HM151907)     | 99                      |
| AMF1047*              | JQ316271         | 3                 | (-) | (+)         | <i>Ensifer adhaerens</i> sp. (AM181735) | 99                      |
| AMF1058*              | JQ316267         | 2                 | (-) | (+)         | <i>Sinorhizobium</i> sp. (EF462381)     | 99                      |
| AMF1120*              | JQ316266         | 3                 | (-) | (+)         | <i>Sinorhizobium</i> sp. (HM151907)     | 98                      |
| AMF1098*              | JQ316275         | 3                 | (-) | (+)         | <i>Sinorhizobium</i> sp. (HM151907)     | 99                      |
| AMF3700*              | JQ316274         | 2                 | (-) | (+)         | <i>Ensifer adhaerens</i> sp. (AM181735) | 99                      |
| AMF1004*              | JQ316270         | 2                 | (-) | (+)         | <i>Sinorhizobium</i> sp. (HM151907)     | 98                      |
| AMF1012               | JQ316273         | 5                 | (-) | (+)         | <i>Sinorhizobium</i> sp. (HM151907)     | 98                      |
| AMF3706               | JQ316433         | 2                 | (-) | (+)         | <i>Sinorhizobium</i> sp. (HM151907)     | 95                      |
| AMF3702               | JQ316272         | 2                 | (-) | (-)         | <i>Sinorhizobium</i> sp. (JN098520)     | 98                      |
| AMF1003*              | JQ316429         | 1                 | (-) | (+)         | <i>Sinorhizobium</i> sp. (JF432095)     | 97                      |
| <i>Rhizobium</i>      |                  |                   |     |             |                                         |                         |
| AMF2473*              | JQ316289         | 2                 | (-) | (+)         | <i>Rhizobium</i> sp. (GU975794)         | 98                      |
| AMF2481*              | JQ316290         | 1                 | (-) | (+)         | <i>Rhizobium tropici</i> (JF318177)     | 98                      |
| AMF3731*              | JQ316291         | 1                 | (-) | (+)         | <i>Rhizobium tropici</i> (FN178365)     | 98                      |
| AMF3727*              | JQ316292         | 3                 | (-) | (+)         | <i>Rhizobium tropici</i> (FN178365)     | 99                      |
| AMF3760               | JQ316287         | 3                 | (-) | (+)         | <i>Rhizobium</i> sp. (EU618037)         | 98                      |
| AMF2585               | JQ316284         | 2                 | (-) | (+)         | <i>Rhizobium</i> sp. (HM151908)         | 99                      |
| AMF1475               | JQ316288         | 3                 | (-) | (+)         | <i>Rhizobium</i> sp. (DQ993274)         | 95                      |
| <i>Bradyrhizobium</i> |                  |                   |     |             |                                         |                         |

|                               |          |   |      |     |                                                 |    |
|-------------------------------|----------|---|------|-----|-------------------------------------------------|----|
| AMF3693*                      | JQ316293 | 4 | (-)  | (+) | <i>Bradyrhizobium</i> sp. (FJ555225)            | 98 |
| <b><i>Ochrobacterum</i></b>   |          |   |      |     |                                                 |    |
| AMF3686                       | JQ316277 | 1 | (-)  | (-) | <i>O. haematophilum</i> (AM422370)              | 97 |
| AMF1022                       | JQ316278 | 3 | (-)  | (-) | <i>O. haematophilum</i> (AM422370)              | 96 |
| AMF4046                       | JQ316279 | 1 | (+)  | (+) | <i>O. haematophilum</i> (AM422370)              | 95 |
| AMF3671                       | JQ316281 | 1 | (+)  | (+) | <i>O. haematophilum</i> (AM422370)              | 95 |
| AMF1005                       | JQ316280 | 3 | (-)  | (-) | <i>O. haematophilum</i> (AM422370)              | 95 |
| AMF3685                       | JQ316282 | 1 | (-)  | (-) | <i>O. haematophilum</i> (AM422370)              | 96 |
| AMF1216                       | JQ316276 | 2 | (+)  | (+) | <i>O. haematophilum</i> (AM422370)              | 98 |
| AMF3696                       | JQ316283 | 3 | (-)  | (+) | <i>O. sp.</i> (FJ493143)                        | 98 |
| <b><i>Phyllobacterium</i></b> |          |   |      |     |                                                 |    |
| AMF3355                       | JQ316256 | 1 | (-)  | (+) | <i>P. myrsinacearum</i> (FJ161353)              | 99 |
| AMF3349                       | JQ316257 | 2 | (+)  | (+) | <i>P. myrsinacearum</i> (FJ161353)              | 99 |
| AMF1307                       | JQ316259 | 6 | (-)  | (+) | <i>P. myrsinacearum</i> (FJ161353)              | 99 |
| AMF1086                       | JQ316262 | 1 | (-)  | (+) | <i>P. sp.</i> KW15 (HQ231954)                   | 98 |
| AMF3668                       | JQ316263 | 3 | (-)  | (+) | <i>P. sp.</i> KW15 (HQ231954)                   | 97 |
| <b><i>Mesorhizobium</i></b>   |          |   |      |     |                                                 |    |
| AMF1340*                      | JQ316264 | 5 | (-)  | (+) | <i>Mesorhizobium</i> sp. Acj 124 (AB480767)     | 97 |
| <b><i>Brevundimonas</i></b>   |          |   |      |     |                                                 |    |
| AMF3205*                      | JQ316299 | 2 | (-)  | (+) | <i>Brevundimonas</i> sp. NBD8 (HQ256539)        | 98 |
| <b><i>Novosphingobium</i></b> |          |   |      |     |                                                 |    |
| AMF3676                       | JQ316300 | 4 | (+)  | (+) | <i>Novosphingobium</i> sp. F2 (FJ377543)        | 97 |
| AMF1198                       | JQ316301 | 2 | (++) | (+) | <i>Sphingomonadaceae</i> sp. (AB461685)         | 98 |
| AMF4013                       | JQ316302 | 1 | (++) | (+) | <i>Novosphingobium</i> sp. (FJ377543)           | 98 |
| <b><i>Burkholderia</i></b>    |          |   |      |     |                                                 |    |
| AMF1239A                      | JQ316410 | 2 | (-)  | (+) | <i>Burkholderia</i> sp. <i>semia</i> (FJ025138) | 99 |
| AMF1239B                      | JQ316409 | 1 | (-)  | (+) | <i>Burkholderia</i> sp. <i>semia</i> (FJ025138) | 99 |

|                                 |          |   |      |     |                                                        |    |
|---------------------------------|----------|---|------|-----|--------------------------------------------------------|----|
| AMF1042                         | JQ316413 | 2 | (-)  | (+) | <i>Burkholderia</i> sp. <i>semia</i> (FJ025138)        | 98 |
| AMF1108                         | JQ316411 | 3 | (+)  | (+) | <i>Burkholderia</i> sp. <i>semia</i> (FJ025138)        | 98 |
| AMF1089                         | JQ316414 | 1 | (-)  | (+) | <i>Burkholderia</i> sp. <i>semia</i> (FJ025138)        | 98 |
| AMF1031                         | JQ316415 | 1 | (+)  | (+) | <i>Burkholderia</i> sp. <i>semia</i> (FJ025138)        | 99 |
| AMF3699                         | JQ316416 | 3 | (-)  | (+) | <i>Burkholderia</i> sp. <i>semia</i> (FJ025138)        | 99 |
| AMF1032                         | JQ316418 | 1 | (+)  | (+) | <i>Burkholderia</i> sp. <i>semia</i> (FJ025138)        | 99 |
| AMF3695                         | JQ316417 | 1 | (-)  | (+) | <i>Burkholderia</i> sp. <i>semia</i> (FJ025138)        | 99 |
| AMF3694                         | JQ316419 | 1 | (-)  | (-) | <i>Burkholderia</i> sp. <i>semia</i> (FJ025138)        | 99 |
| AMF3683                         | JQ316387 | 3 | (+)  | (+) | <i>Burkholderia</i> sp. <i>semia</i> (FJ025138)        | 97 |
| AMF4052                         | JQ316420 | 2 | (-)  | (+) | <i>Burkholderia</i> sp. (AB303628)                     |    |
| AMF1095*                        | JQ316412 | 1 | (++) | (+) | <i>Burkholderia tropica</i> (EF622219)                 | 99 |
| AMF1017*                        | JQ316408 | 4 | (++) | (+) | <i>Burkholderia tropica</i> (EF622219)                 | 98 |
| AMF3733                         | JQ316397 | 1 | (-)  | (-) | <i>Burkholderia</i> sp. <i>CBPB-CHS</i> (AY640617)     | 98 |
| AMF3716A                        | JQ316402 | 3 | (-)  | (+) | <i>Burkholderia</i> sp. <i>EW7</i> (HQ231941)          | 99 |
| AMF3716B                        | JQ316401 | 1 | (-)  | (+) | <i>Burkholderia</i> sp. <i>EW7</i> (HQ231941)          | 99 |
| AMF3715                         | JQ316404 | 1 | (-)  | (+) | <i>Burkholderia</i> sp. <i>EW7</i> (HQ231941)          | 99 |
| AMF3732                         | JQ316405 | 2 | (-)  | (+) | <i>Burkholderia</i> sp. <i>IT1(2011)</i> (JF825996)    | 98 |
| AMF3723                         | JQ316407 | 1 | (-)  | (+) | <i>Burkholderia cepacia</i> (HQ236034)                 | 98 |
| <b><i>Ralstonia</i></b>         |          |   |      |     |                                                        |    |
| AMF1060                         | JQ316400 | 1 | (+)  | (+) | <i>Ralstonia</i> sp. <i>MCT1</i> (DQ232889)            | 98 |
| AMF1009                         | JQ316396 | 1 | (+)  | (+) | <i>Ralstonia</i> sp. <i>MCT1</i> (DQ232889)            | 99 |
| AMF3711                         | JQ316398 | 2 | (++) | (+) | <i>Ralstonia</i> sp. (D88009)                          | 98 |
| <b><i>Janthinobacterium</i></b> |          |   |      |     |                                                        |    |
| AMF2255                         | JQ316389 | 1 | (-)  | (-) | <i>Janthinobacterium</i> sp. <i>TN115</i> (HQ680635)   | 98 |
| AMF1010                         | JQ316390 | 3 | (-)  | (-) | <i>Janthinobacterium</i> sp. <i>Acj 103</i> (AB480751) | 99 |
| <b><i>Variovorax</i></b>        |          |   |      |     |                                                        |    |
| AMF1302                         | JQ316399 | 2 | (-)  | (-) | <i>Variovorax paradoxus</i> (FJ527675)                 | 99 |
| <b><i>Xanthomonas</i></b>       |          |   |      |     |                                                        |    |
| AMF1020                         | JQ316394 | 1 | (+)  | (-) | <i>Xanthomonas campestris</i> (HQ256868)               | 98 |

|                                |          |   |      |     |                                            |    |
|--------------------------------|----------|---|------|-----|--------------------------------------------|----|
| AMF1021                        | JQ316392 | 1 | (-)  | (+) | <i>Stenotrophomonas</i> sp. HQ256870)      | 98 |
| <b><i>Pseudomonas</i></b>      |          |   |      |     |                                            |    |
| AMF2097                        | JQ316316 | 1 | (+)  | (-) | <i>Pseudomonas brenneri</i> (FN393788)     | 99 |
| AMF2108                        | JQ316350 | 1 | (-)  | (-) | <i>Pseudomonas</i> sp. (HM196354)          | 99 |
| AMF1271A                       | JQ316335 | 4 | (-)  | (+) | <i>Pseudomonas chlororaphis</i> (AY216795) | 98 |
| AMF1271B                       | JQ316340 | 1 | (-)  | (+) | <i>Pseudomonas chlororaphis</i> (AY216795) | 99 |
| AMF1326                        | JQ316331 | 1 | (-)  | (+) | <i>Pseudomonas chlororaphis</i> (AY216795) | 99 |
| AMF1310                        | JQ316348 | 3 | (-)  | (+) | <i>Pseudomonas chlororaphis</i> (AY216795) | 99 |
| AMF2704                        | JQ316352 | 2 | (-)  | (+) | <i>Pseudomonas</i> sp. (FJ786056)          | 96 |
| AMF2232                        | JQ316361 | 1 | (-)  | (-) | <i>Pseudomonas</i> sp. (AM184269)          | 99 |
| AMF1320                        | JQ316374 | 1 | (++) | (+) | <i>Pseudomonas putida</i> (EU443617)       | 97 |
| AMF1081                        | JQ316370 | 1 | (++) | (+) | <i>Pseudomonas</i> sp. (HQ840771)          | 97 |
| AMF4027                        | JQ316372 | 1 | (++) | (+) | <i>Pseudomonas putida</i> (GQ221267)       | 96 |
| AMF1132                        | JQ316371 | 2 | (++) | (+) | <i>Pseudomonas</i> sp. (HQ840771)          | 99 |
| AMF1141                        | JQ316368 | 1 | (++) | (+) | <i>Pseudomonas</i> sp. (HQ840771)          | 99 |
| AMF1139                        | JQ316365 | 1 | (++) | (+) | <i>Pseudomonas</i> sp. (HQ840771)          | 99 |
| AMF3697                        | JQ316362 | 3 | (++) | (+) | <i>Pseudomonas</i> sp. (HQ840771)          | 99 |
| AMF1074                        | JQ316366 | 4 | (++) | (+) | <i>Pseudomonas</i> sp. (JF895527)          | 99 |
| AMF4016                        | JQ316364 | 2 | (-)  | (+) | <i>Pseudomonas</i> sp. (HQ840771)          | 98 |
| AMF1080                        | JQ316373 | 1 | (++) | (+) | <i>Pseudomonas putida</i> (EU364531)       | 98 |
| AMF2140                        | JQ316363 | 1 | (++) | (+) | <i>Pseudomonas</i> sp. (JF825993)          | 99 |
| AMF1076                        | JQ316367 | 1 | (-)  | (+) | <i>Pseudomonas</i> sp. (DQ079062)          | 99 |
| AMF2883                        | JQ316317 | 1 | (+)  | (+) | <i>Pseudomonas</i> sp. (EU680994)          | 99 |
| AMF3580                        | JQ316318 | 1 | (+)  | (+) | <i>Pseudomonas</i> sp. (EU680994)          | 99 |
| AMF2761                        | JQ316358 | 1 | (-)  | (-) | <i>Pseudomonas</i> sp. (EU680994)          | 99 |
| AMF2141                        | JQ316349 | 1 | (-)  | (-) | <i>Pseudomonas</i> sp. ps4-4               | 99 |
| AMF1075                        | JQ316369 | 1 | (-)  | (-) | <i>Pseudomonas putida</i> (HM755529)       | 98 |
| <b><i>Acinetobacterium</i></b> |          |   |      |     |                                            |    |
| AMF3708                        | JQ316376 | 2 | (+)  | (-) | <i>Acinetobacter septicus</i> (FJ263922)   | 95 |

**Enterobacter**

|          |          |   |      |     |                                           |    |
|----------|----------|---|------|-----|-------------------------------------------|----|
| AMF3714* | JQ316382 | 7 | (+)  | (+) | <i>Enterobacter</i> sp. ICB464 (HM013842) | 98 |
| AMF3707* | JQ316383 | 5 | (+)  | (+) | <i>Enterobacter</i> sp. MTH17 (HQ202542)  | 98 |
| AMF3709* | JQ316385 | 4 | (++) | (+) | <i>Enterobacter</i> sp. NII-72 (FJ897483) | 98 |
| AMF2479  | JQ316384 | 2 | (++) | (+) | <i>Enterobacter</i> sp. (FJ179170)        | 99 |

**Bacillus**

|         |          |   |     |     |                                        |    |
|---------|----------|---|-----|-----|----------------------------------------|----|
| AMF3675 | JQ316238 | 4 | (-) | (+) | <i>Bacillus</i> sp. LT3 (FJ946999)     | 99 |
| AMF3664 | JQ316239 | 1 | (-) | (+) | <i>Bacillus cereus</i> GMX6 (AM422128) | 99 |
| AMF3682 | JQ316244 | 2 | (+) | (+) | <i>Bacillus</i> sp. CH-1 (EF506944)    | 97 |
| AMF1027 | JQ316240 | 1 | (-) | (+) | <i>Bacillus</i> sp. IMT02 (FR727712)   | 99 |
| AMF1194 | JQ316241 | 2 | (+) | (+) | <i>Bacillus</i> sp. IMT02 (FR727712)   | 99 |
| AMF3684 | JQ316242 | 3 | (+) | (+) | <i>Bacillus</i> sp. SB-S2 (EU912476)   | 99 |
| AMF1303 | JQ316243 | 1 | (+) | (+) | <i>Bacillus</i> sp. HJB004 (HQ331103)  | 98 |
| AMF3673 | JQ316252 | 1 | (-) | (-) | <i>Bacillus</i> sp. BD-85 (AF169519)   | 98 |
| AMF3810 | JQ316253 | 1 | (-) | (-) | <i>Bacillus</i> sp. 13644B (EU741095)  | 97 |
| AMF3801 | JQ316250 | 2 | (-) | (-) | <i>Bacillus</i> sp. 13644B (EU741095)  | 98 |
| AMF3820 | JQ316248 | 1 | (-) | (-) | <i>Bacillus</i> sp. 13644B (EU741095)  | 98 |
| AMF3815 | JQ316251 | 3 | (-) | (-) | <i>Bacillus</i> sp. 13644B             | 98 |

**Staphylococcus**

|         |          |   |     |     |                                              |    |
|---------|----------|---|-----|-----|----------------------------------------------|----|
| AMF1766 | JQ316245 | 3 | (-) | (+) | <i>Staphylococcus warneri</i> (HQ831388)     | 98 |
| AMF3679 | JQ316246 | 1 | (-) | (+) | <i>Staphylococcus warneri</i> (HQ831387)     | 98 |
| AMF3826 | JQ316247 | 1 | (-) | (+) | <i>Staphylococcus epidermidis</i> (FJ613578) | 99 |

**Paenibacillus**

|         |          |   |     |     |                                         |    |
|---------|----------|---|-----|-----|-----------------------------------------|----|
| AMF4044 | JQ31625  | 2 | (+) | (+) | <i>Paenibacillus glebae</i> (AM745264)  | 98 |
| AMF3667 | JQ316255 | 3 | (+) | (+) | <i>Paenibacillus</i> sp. D75 (HQ657320) | 99 |

**Rhodococcus**

|         |          |   |     |     |                                        |    |
|---------|----------|---|-----|-----|----------------------------------------|----|
| AMF3816 | JQ316217 | 1 | (+) | (+) | <i>Rhodococcus</i> sp. PSS3 (JF768732) | 99 |
| AMF3817 | JQ316218 | 4 | (+) | (+) | <i>Rhodococcus</i> sp. 4-8 (FJ905295)  | 98 |

|                              |           |   |      |     |                                              |    |
|------------------------------|-----------|---|------|-----|----------------------------------------------|----|
| AMF1174                      | JQ316219  | 3 | (-)  | (+) | <i>Rhodococcus</i> sp. L-15 (JN006270)       | 97 |
| AMF1192                      | JQ316220  | 3 | (-)  | (+) | <i>Rhodococcus</i> sp. RD6.2 (AY436807)      | 97 |
| AMF3804                      | JQ316224  | 3 | (+)  | (+) | <i>Rhodococcus</i> sp. RD6.2 (AY436807)      | 97 |
| AMF3687                      | JQ316222  | 6 | (+)  | (+) | <i>Rhodococcus qingshengii</i> (HQ202829)    | 97 |
| <b><i>Nocardia</i></b>       |           |   |      |     |                                              |    |
| AMF1157                      | JQ316431  | 3 | (-)  | (+) | <i>Nocardia</i> sp. YU011-1 (AB092437)       | 99 |
| <b><i>Mycobacterium</i></b>  |           |   |      |     |                                              |    |
| AMF3831                      | JQ316215) | 3 | (-)  | (+) | <i>Mycobacterium</i> sp. NMR17-5 (AB286061)  | 99 |
| AMF3833                      | JQ316216) | 2 | (-)  | (-) | <i>Mycobacterium</i> sp. NMR17-5 (AB286061)  | 99 |
| <b><i>Arthrobacter</i></b>   |           |   |      |     |                                              |    |
| AMF3782                      | JQ316231  | 1 | (-)  | (-) | <i>Arthrobacter</i> sp. CFM 20 (FN666614)    | 97 |
| AMF1288A                     | JQ316228  | 2 | (-)  | (-) | <i>Arthrobacter</i> sp. D48 (HQ657321)       | 98 |
| AMF1288B                     | JQ316229  | 1 | (-)  | (-) | <i>Arthrobacter</i> sp. (HQ657321)           | 96 |
| AMF1087                      | JQ316230  | 1 | (-)  | (-) | <i>Arthrobacter</i> sp. KMSZP1 (JF768706)    | 98 |
| <b><i>Kocuria</i></b>        |           |   |      |     |                                              |    |
| AMF1062                      | JQ316232  | 2 | (-)  | (+) | <i>Kocuria rhizophila</i> (AB274746)         | 98 |
| <b><i>Micrococcus</i></b>    |           |   |      |     |                                              |    |
| AMF1273*                     | JQ316233  | 6 | (++) | (+) | <i>Micrococcus luteus</i> (AB617561)         | 99 |
| <b><i>Streptomyces</i></b>   |           |   |      |     |                                              |    |
| AMF1200                      | JQ316236  | 1 | (-)  | (-) | <i>Streptomyces pulveraceus</i> (GU296740)   | 97 |
| AMF3811                      | JQ316234  | 1 | (-)  | (-) | <i>Streptomyces bikiniensis</i> (EU741193)   | 96 |
| AMF1055                      | JQ316235  | 2 | (-)  | (-) | <i>Streptomyces nashvillensis</i> (FJ481063) | 97 |
| <b><i>Flavobacterium</i></b> |           |   |      |     |                                              |    |
| AMF1579                      | JQ316421  | 2 | (+)  | (+) | <i>Flavobacterium ahuensis</i> (GQ284450)    | 97 |
| AMF1599                      | JQ316423  | 1 | (+)  | (+) | <i>Flavobacterium</i> sp. (DQ072106)         | 96 |
| AMF1563                      | JQ316422  | 1 | (-)  | (+) | <i>Flavobacterium ahuensis</i> (GQ284450)    | 98 |
| AMF1281                      | JQ316425  | 2 | (+)  | (+) | <i>Flavobacterium</i> sp. 30C (EU057850)     | 98 |

|                                                                                                      |          |    |     |     |                                             |    |
|------------------------------------------------------------------------------------------------------|----------|----|-----|-----|---------------------------------------------|----|
| AMF1286                                                                                              | JQ316426 | 3  | (-) | (+) | <i>Flavobacterium</i> sp. 30C (EU057850)    | 98 |
| <b><i>Chatinophyga</i></b>                                                                           |          |    |     |     |                                             |    |
| AMF4045                                                                                              | JQ316428 | 3  | (+) | (+) | <i>Chitinophaga</i> sp. (FJ750951)          | 98 |
| <b>Isolates from Semisolid/solid hypoxic plates (incubated under 20 and 2% oxygen concentration)</b> |          |    |     |     |                                             |    |
| <b><i>Sinorhizobium</i></b>                                                                          |          |    |     |     |                                             |    |
| AMF4038                                                                                              | JQ316269 | 2  | (-) | (+) | <i>Sinorhizobium</i> sp. (HM151907)         | 98 |
| AMF1082*                                                                                             | JQ316430 | 4  | (-) | (+) | <i>Ensifer</i> sp. MN4 (JN082738)           | 97 |
| <b><i>Rhizobium</i></b>                                                                              |          |    |     |     |                                             |    |
| AMF3123                                                                                              | JQ316286 | 8  | (-) | (+) | <i>Rhizobium</i> sp. 3 (HM151908)           | 99 |
| AMF2639                                                                                              | JQ316294 | 5  | (-) | (+) | <i>Rhizobium</i> sp. CCBAU 33107 (DQ993274) | 95 |
| <b><i>Phyllobacterium</i></b>                                                                        |          |    |     |     |                                             |    |
| AMF1305                                                                                              | JQ316260 | 3  | (+) | (+) | <i>P. myrsinacearum</i> (FJ161353)          | 99 |
| AMF3562                                                                                              | JQ316258 | 4  | (-) | (+) | <i>P. myrsinacearum</i> (FJ161359)          | 98 |
| AMF3561                                                                                              | JQ316261 | 11 | (-) | (+) | <i>P. myrsinacearum</i> (FJ161359)          | 98 |
| <b><i>Brevundimonas</i></b>                                                                          |          |    |     |     |                                             |    |
| AMF3564*                                                                                             | JQ316295 | 5  | (-) | (+) | <i>Brevundimonas intermedia</i> (JF915342)  | 97 |
| AMF3565*                                                                                             | JQ316296 | 3  | (-) | (+) | <i>Brevundimonas intermedia</i> (JF915342)  | 97 |
| <b><i>Burkholderia</i></b>                                                                           |          |    |     |     |                                             |    |
| AMF3734                                                                                              | JQ316403 | 3  | (-) | (+) | <i>Burkholderia cepacia</i> (HQ236034)      | 99 |
| AMF3698                                                                                              | JQ316388 | 6  | (-) | (+) | <i>Burkholderia sabiae</i> (AY773185)       | 98 |
| <b><i>Varivorax</i> sp.</b>                                                                          |          |    |     |     |                                             |    |
| AMF3553                                                                                              | JQ316395 | 6  | (-) | (+) | <i>Variovorax paradoxus</i> (HQ219937)      | 99 |
| <b><i>Pseudomonas</i></b>                                                                            |          |    |     |     |                                             |    |
| AMF3567 <sup>a</sup>                                                                                 | JQ316303 | 29 | (+) | (+) | <i>Pseudomonas brenneri</i> (FN393788)      | 99 |



|                      |          |    |     |     |                                                  |    |
|----------------------|----------|----|-----|-----|--------------------------------------------------|----|
| AMF3570 <sup>a</sup> | JQ316303 | -  | (+) | (+) | <i>Pseudomonas brenneri</i> (FN393788)           | 99 |
| AMF3550 <sup>a</sup> | JQ316303 | -  | (+) | (+) | <i>Pseudomonas brenneri</i> (FN393787)           | 99 |
| AMF3569 <sup>a</sup> | JQ316303 | -  | (+) | (+) | <i>Pseudomonas brenneri</i> (FN393787)           | 99 |
| AMF3551              | JQ316325 | 2  | (+) | (+) | <i>Pseudomonas brenneri</i> (JF970596)           | 98 |
| AMF3545 <sup>b</sup> | JQ316328 | 23 | (-) | (+) | <i>Pseudomonas chlororaphis</i> (AY216795)       | 99 |
| AMF3556 <sup>b</sup> | JQ316328 | -  | (-) | (+) | <i>Pseudomonas chlororaphis</i> (AY216795)       | 99 |
| AMF3571 <sup>b</sup> | JQ316330 | -  | (-) | (+) | <i>Pseudomonas chlororaphis</i> (AY216795)       | 99 |
| AMF3554 <sup>b</sup> | JQ316338 | -  | (-) | (+) | <i>Pseudomonas chlororaphis</i> (AY216795)       | 99 |
| AMF3138 <sup>b</sup> | JQ316329 | -  | (-) | (+) | <i>Pseudomonas chlororaphis</i> (JF970596)       | 99 |
| AMF3540              | JQ316307 | 4  | (+) | (-) | <i>Pseudomonas brenneri</i> (JF970596)           | 98 |
| AMF3546              | JQ316309 | 2  | (-) | (-) | <i>Pseudomonas brenneri</i> (FN393788)           | 97 |
| AMF3544              | JQ316308 | 7  | (+) | (-) | <i>Pseudomonas brenneri</i> (AY864636)           | 97 |
| AMF3578              | JQ316324 | 9  | (-) | (+) | <i>Pseudomonas brenneri</i> (JF970596)           | 98 |
| AMF3575              | JQ316314 | 1  | (+) | (+) | <i>Pseudomonas</i> sp. <i>DVS6dla</i> (JF970596) | 98 |
| AMF3543              | JQ316306 | 5  | (-) | (+) | <i>Pseudomonas brenneri</i> (FN393788)           | 98 |
| AMF3089              | JQ316315 | 3  | (-) | (+) | <i>Pseudomonas brenneri</i> (JF970596)           | 98 |
| AMF3577              | JQ316321 | 6  | (+) | (+) | <i>Pseudomonas brenneri</i> (AB545749)           | 98 |
| AMF3576              | JQ316320 | 4  | (-) | (+) | <i>Pseudomonas brenneri</i> (JF970596)           | 99 |
| AMF3574              | JQ316347 | 4  | (+) | (+) | <i>Pseudomonadaceae</i> bacterium (JF970596)     | 97 |
| AMF3541              | JQ316312 | 3  | (+) | (+) | <i>Pseudomonas brenneri</i> (JF970596)           | 98 |
| AMF3552              | JQ316323 | 1  | (-) | (+) | <i>Pseudomonas brenneri</i> (FN393788)           | 99 |
| AMF3568              | JQ316313 | 7  | (+) | (+) | <i>Pseudomonas brenneri</i> (JF970596)           | 98 |
| AMF3132              | JQ316334 | 5  | (-) | (+) | <i>Pseudomonas chlororaphis</i> (AY216795)       | 97 |
| AMF3555              | JQ316333 | 1  | (-) | (+) | <i>Pseudomonas chlororaphis</i> (AY216795)       | 99 |
| AMF3558              | JQ316332 | 9  | (-) | (+) | <i>Pseudomonas chlororaphis</i> (AY216795)       | 98 |
| AMF3559              | JQ316339 | 8  | (+) | (+) | <i>Pseudomonas fluorescens</i> (JN030498)        | 98 |
| AMF3560              | JQ316336 | 7  | (+) | (-) | <i>Pseudomonas fluorescens</i> (JN030498)        | 97 |
| AMF3572              | JQ316337 | 7  | (-) | (-) | <i>Pseudomonas chlororaphis</i> (AY216795)       | 95 |
| AMF2675              | JQ316359 | 9  | (-) | (+) | <i>Pseudomonas</i> sp. <i>OS-17B</i> (EF612350)  | 99 |
| AMF3660              | JQ316363 | 3  | (+) | (+) | <i>Pseudomonas plecoglossicida</i> (EU594553.1)  | 99 |

***Enterobacter***

|                                                                                  |          |   |      |     |                                              |    |
|----------------------------------------------------------------------------------|----------|---|------|-----|----------------------------------------------|----|
| AMF2472                                                                          | JQ316386 | 7 | (++) | (+) | <i>Enterobacter</i> sp. sw39 (FJ179170)      | 99 |
| <b><i>Bacillus</i></b>                                                           |          |   |      |     |                                              |    |
| AMF1207                                                                          | JQ316237 | 5 | (-)  | (+) | <i>Bacillus</i> sp. LT3 (FJ946999)           | 99 |
| AMF3812                                                                          | JQ316249 | 3 | (-)  | (-) | <i>Bacillus</i> sp. I3644B (EU741095)        | 98 |
| <b><i>Rhodococcus</i></b>                                                        |          |   |      |     |                                              |    |
| AMF3538                                                                          | JQ316225 | 3 | (+)  | (+) | <i>Rhodococcus qingshengii</i> (HQ202829)    | 98 |
| AMF3536                                                                          | JQ316221 | 1 | (+)  | (+) | <i>Rhodococcus</i> sp. CmLB13 (HM352337)     | 98 |
| AMF3537                                                                          | JQ316223 | 3 | (+)  | (+) | <i>Rhodococcus qingshengii</i> (HQ202829)    | 97 |
| AMF3539                                                                          | JQ316226 | 1 | (+)  | (+) | <i>Rhodococcus qingshengii</i> (HQ202829)    | 98 |
| <b><i>Curtobacterium</i></b>                                                     |          |   |      |     |                                              |    |
| AMF3581*                                                                         | JQ316432 | 2 | (+)  | (+) | <i>Curtobacterium citreum</i> (FN178369)     | 96 |
| AMF3579*                                                                         | JQ316227 | 7 | (+)  | (+) | <i>Curtobacterium citreum</i> (FN178369)     | 98 |
| <b><i>Flavobacterium</i></b>                                                     |          |   |      |     |                                              |    |
| AMF3566                                                                          | JQ316427 | 6 | (+)  | (+) | <i>Flavobacterium</i> sp. 30C (EU057850)     | 97 |
| <b>Isolates from Semisolid medium (incubated under 20% oxygen concentration)</b> |          |   |      |     |                                              |    |
| <b><i>Rhizobium</i></b>                                                          |          |   |      |     |                                              |    |
| AMF3547                                                                          | JQ316285 | 6 | (-)  | (+) | <i>Rhizobium</i> sp. PRNB-25 (HQ589028)      | 99 |
| <b><i>Brevundimonas</i></b>                                                      |          |   |      |     |                                              |    |
| AMF3276*                                                                         | JQ316297 | 4 | (-)  | (+) | <i>Brevundimonas</i> sp. NBD8 (HQ256539)     | 99 |
| AMF3266*                                                                         | JQ316298 | 6 | (-)  | (+) | <i>Brevundimonas</i> sp. NCCP-147 (AB549434) | 98 |
| <b><i>Burkholderia</i></b>                                                       |          |   |      |     |                                              |    |
| AMF3725                                                                          | JQ316406 | 2 | (-)  | (+) | <i>Burkholderia</i> sp. CBPB-CHS (AY640617)  | 99 |
| <b><i>Xanthomonas</i> sp.</b>                                                    |          |   |      |     |                                              |    |
| AMF3320                                                                          | JQ316393 | 1 | (-)  | (+) | <i>Xanthomonas</i> sp. (DQ279313)            | 99 |

|                            |          |    |      |     |                                            |    |
|----------------------------|----------|----|------|-----|--------------------------------------------|----|
| AMF2667                    | JQ316391 | 4  | (-)  | (+) | <i>Xanthomonas</i> sp. (DQ279313)          | 99 |
| <b><i>Pseudomonas</i></b>  |          |    |      |     |                                            |    |
| AMF2763A <sup>c</sup>      | JQ316326 | 31 | (+)  | (+) | <i>Pseudomonas brenneri</i> (FN393788)     | 98 |
| AMF4009 <sup>c</sup>       | JQ316310 | -  | (+)  | (+) | <i>Pseudomonas brenneri</i> (FN393788)     | 98 |
| AMF2753 <sup>d</sup>       | JQ316322 | 4  | (+)  | (+) | <i>Pseudomonas brenneri</i> (FN393788)     | 98 |
| AMF2763B <sup>d</sup>      | JQ316305 | -  | (+)  | (+) | <i>Pseudomonas brenneri</i> (FN393788)     | 98 |
| AMF2636 <sup>d</sup>       | JQ316304 | -  | (+)  | (+) | <i>Pseudomonas brenneri</i> (FN393788)     | 98 |
| AMF2809B <sup>e</sup>      | JQ316351 | 58 | (-)  | (+) | <i>Pseudomonas</i> sp. OS-17B (EF612350)   | 98 |
| AMF3014 <sup>e</sup>       | -        | -  | (-)  | (+) | <i>Pseudomonas</i> sp. OS-17B (EF612350)   | 99 |
| AMF3003 <sup>e</sup>       | -        | -  | (-)  | (+) | <i>Pseudomonas</i> sp. 3-11 (HM057102)     | 98 |
| AMF3038 <sup>e</sup>       | JQ316357 | -  | (-)  | (+) | <i>Pseudomonas</i> sp. OS-17B (EF612350)   | 99 |
| AMF3322 <sup>e</sup>       | -        | -  | (-)  | (+) | <i>Pseudomonas</i> sp. 3-11 (HM057102)     | 98 |
| AMF3323 <sup>e</sup>       | -        | -  | (-)  | (+) | <i>Pseudomonas</i> sp. OS-17B (EF612350)   | 99 |
| AMF3147 <sup>e</sup>       | JQ316356 | -  | (-)  | (+) | <i>Pseudomonas koreensis</i> (HM367599)    | 99 |
| AMF3110 <sup>e</sup>       | -        | -  | (-)  | (+) | <i>Pseudomonas</i> sp. 3-11 (HM057102)     | 99 |
| AMF3319 <sup>e</sup>       | JQ316354 | -  | (-)  | (+) | <i>Pseudomonas koreensis</i> (HM367598)    | 98 |
| AMF2809A                   | JQ316311 | 8  | (-)  | (-) | <i>Thermoleophilum minutum</i> (HQ223108)  | 97 |
| AMF3013                    | JQ316343 | 4  | (-)  | (-) | <i>Pseudomonas</i> sp. A-BT-68 (JF901709)  | 97 |
| AMF2668                    | JQ316341 | 5  | (++) | (+) | <i>Pseudomonas</i> sp. B-AS-44 (JF901706)  | 98 |
| AMF2669                    | JQ316342 | 2  | (++) | (+) | <i>Pseudomonas</i> sp. B-AS-44 (JF901706)  | 98 |
| AMF3010                    | JQ316345 | 4  | (+)  | (-) | <i>Pseudomonas</i> sp. (JF901709)          | 99 |
| AMF2745                    | JQ316346 | 5  | (+)  | (+) | <i>Pseudomonas</i> sp. (GU595349)          | 99 |
| AMF3005                    | JQ316353 | 14 | (+)  | (+) | <i>Pseudomonas</i> sp. (FJ786056)          | 96 |
| AMF3006                    | JQ316355 | 11 | (-)  | (+) | <i>Pseudomonas</i> sp. (EF612350)          | 98 |
| AMF2689                    | JQ316360 | 16 | (-)  | (-) | <i>Pseudomonas</i> sp. (EF612350)          | 99 |
| AMF3573                    | JQ316319 | 11 | (-)  | (-) | <i>Thermoleophilum minutum</i> (HQ223108)  | 98 |
| AMF3272                    | JQ316327 | 7  | (-)  | (+) | <i>Pseudomonas chlororaphis</i> (AY216795) | 99 |
| AMF1810                    | JQ316375 | 15 | (++) | (+) | <i>Pseudomonas putida</i> (DQ986385)       | 96 |
| <b><i>Enterobacter</i></b> |          |    |      |     |                                            |    |
| AMF1353                    | JQ316381 | 5  | (+)  | (+) | <i>Enterobacter</i> sp. (HQ202542)         | 98 |

***Rahnella***

|         |          |   |     |     |                                      |    |
|---------|----------|---|-----|-----|--------------------------------------|----|
| AMF3011 | JQ316380 | 8 | (+) | (-) | <i>Rahnella aquatilis</i> (AY253920) | 99 |
| AMF2806 | JQ316377 | 9 | (+) | (-) | <i>Rahnella aquatilis</i> (AY253921) | 98 |
| AMF2811 | JQ316379 | 1 | (+) | (-) | <i>Rahnella aquatilis</i> (AY253920) | 97 |
| AMF3007 | JQ316378 | 3 | (-) | (-) | <i>Rahnella aquatilis</i> (AY253921) | 98 |

***Flavobacterium***

|         |          |   |     |     |                                      |    |
|---------|----------|---|-----|-----|--------------------------------------|----|
| AMF2626 | JQ316424 | 7 | (-) | (+) | <i>Flavobacterium</i> sp. (JF772477) | 95 |
|---------|----------|---|-----|-----|--------------------------------------|----|

\* The *nifH* gene amplification was possible with a single PCR.
